# Supplementary material
Source: MDPI journal article supplement (https://www.mdpi.com/2079-6412/8/5/184)
Supplement: s1 [file s1]

# Supplementary Materials: Hydrophilic Self-Replenishing Coatings with Long-Term Water Stability for Anti-Fouling Applications

Isabel Jiménez-Pardo, Leendert G. J. van der Ven, Rolf A. T. M. van Benthem, Gijsbertus de With and A. Catarina C. Esteves

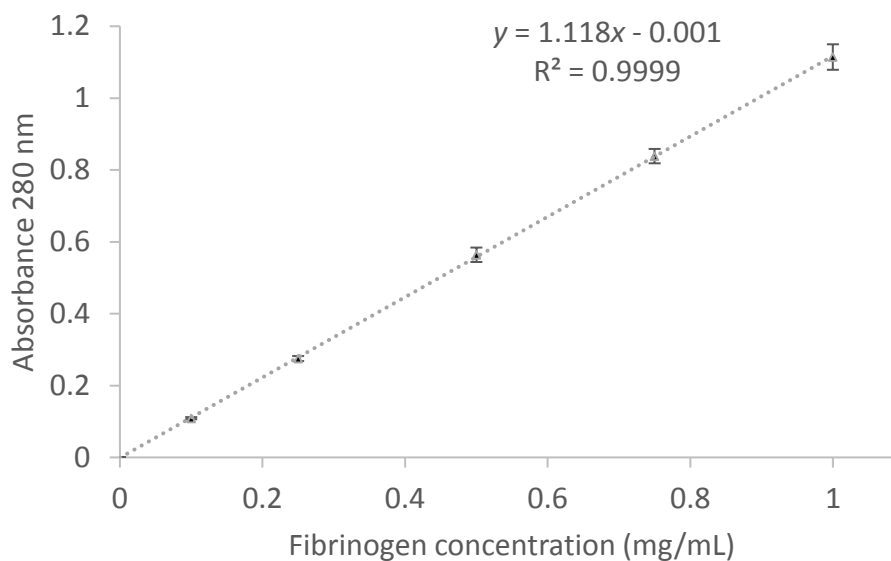

**Figure S1.** Fibrinogen calibration curve built from PBS protein solutions of 0.1–1 mg·mL<sup>-1</sup> and having a good linearity in the measured concentration range with R<sup>2</sup> of 0.9999.

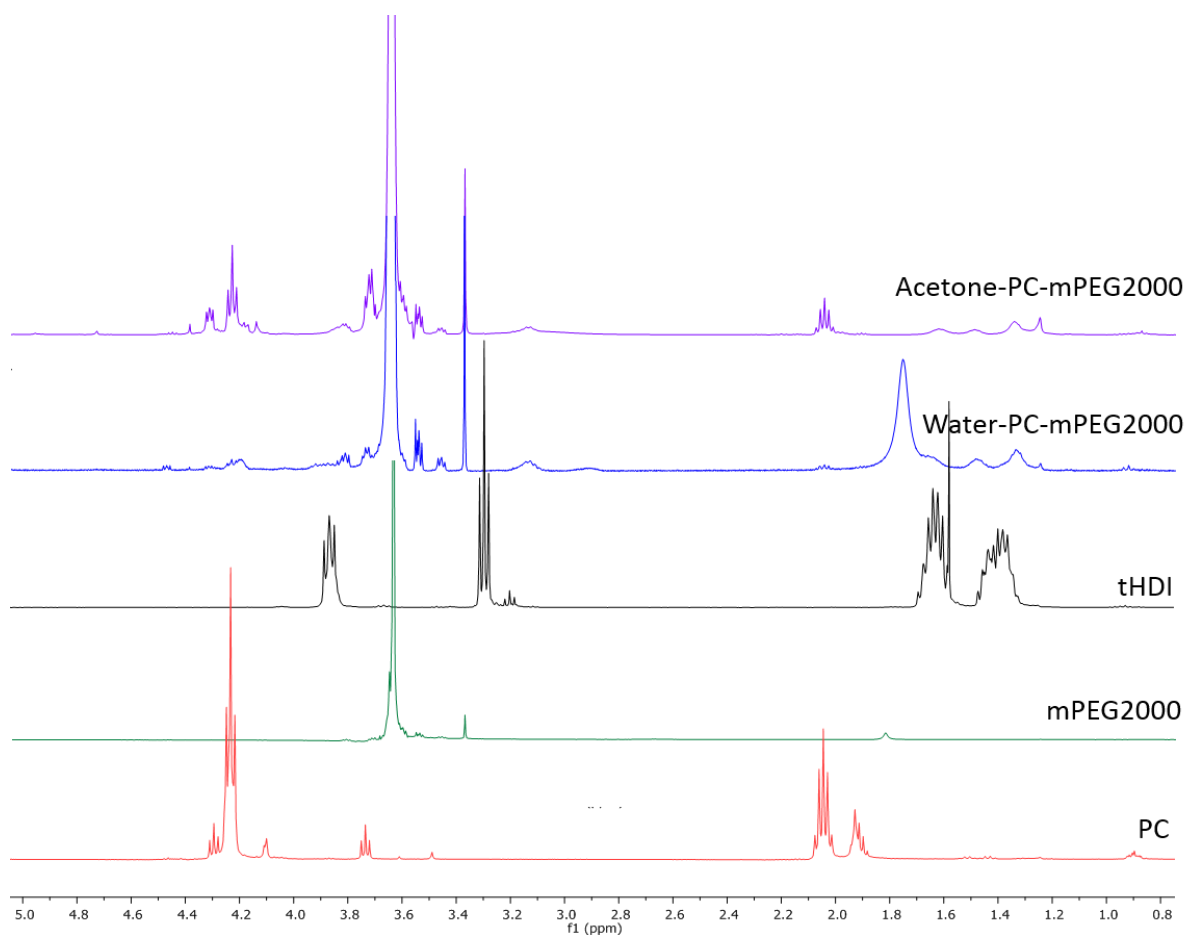

**Figure S2.**  $^1\text{H}$ -NMR spectra (400 MHz,  $\text{CDCl}_3$ ) for PC-mPEG2000 acetone and water extracts, and pure coatings components, tHDI, mPEG2000 and PC polymer.

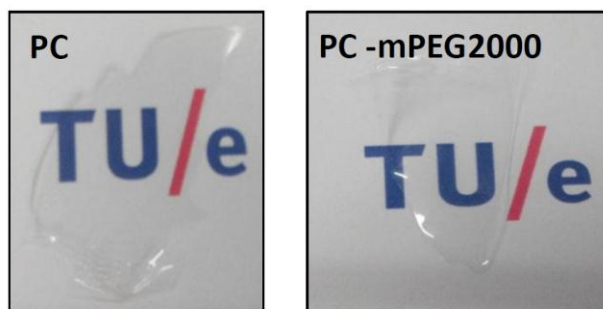

|             | Weight Loss (%) |
|-------------|-----------------|
| PC-Ref      | $1.2 \pm 0.5$   |
| PC-mPEG550  | $2.1 \pm 1.3$   |
| PC-mPEG1000 | $2.3 \pm 1.1$   |
| PC-mPEG2000 | $3.1 \pm 1.8$   |

**Figure S3.** Coatings appearance and weight loss (%) after 1 year water immersion. PC and PC-mPEG2000 images after 1 year immersion in water. Transparent and colorless free standing coatings placed on top of a logo.

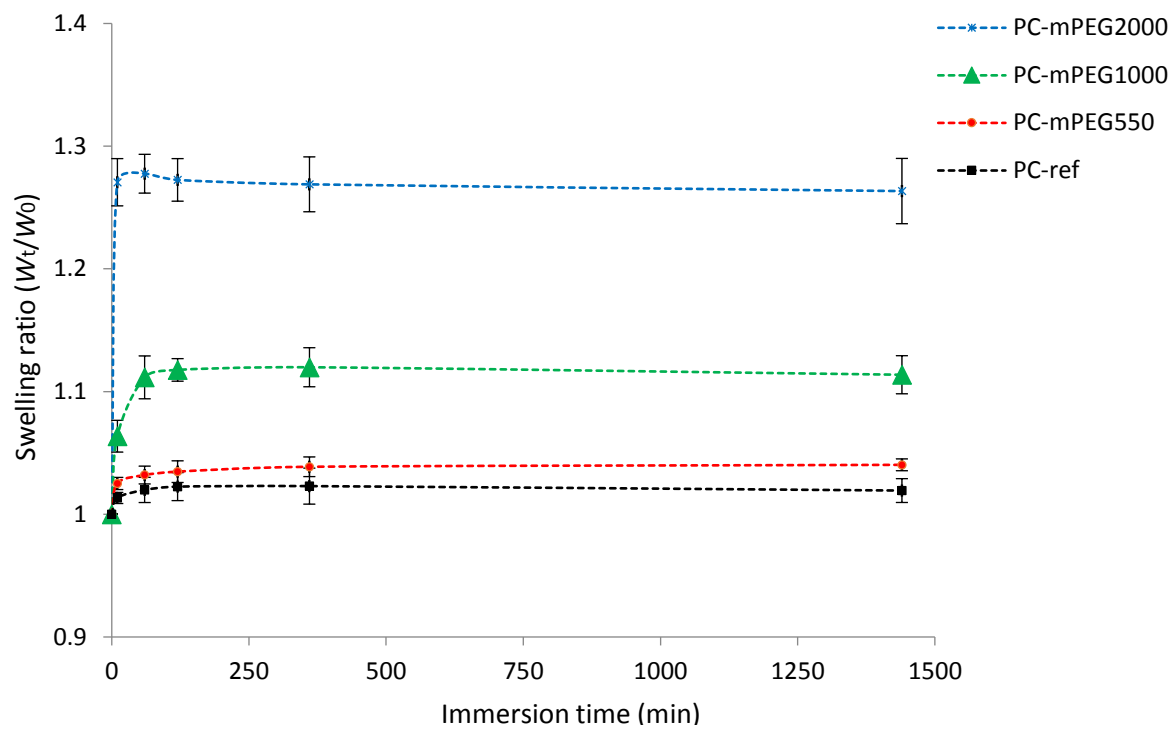

**Figure S4.** Swelling ratio profiles (weight of water swollen coating at different immersion times ( $W_t$ ) divided by the initial dried coating ( $W_0$ )) for coatings immersed in water for 24 h.
